# Supplementary material for: Human induced pluripotent stem cells for in vitro modeling of impaired mucociliary clearance in cystic fibrosis lung disease
Source: Stem Cell Res Ther. 2025 Oct 21;16:573. doi: 10.1186/s13287-025-04737-0 (PMC12538740; doi:10.1186/s13287-025-04737-0)
Supplement: Supplementary file 1 — Supplementary Material 1 [file 13287_2025_4737_MOESM1_ESM.xlsx]

## Sheet: Media and solutions
Media and solutions	Reagents
Basis medium	KnockOutTM DMEM medium
	5% KnockOutTM serum replacement
	1% Penicilin-Streptamycin
	1% L-glutamine
	1% MEM non-essential amino acids
	0.46 mM Monothioglycerol
E8 medium	DMEM/F12 medium
	64 mg/L L-Ascorbic acid 2-phosphat sesquimagnesium salt hydrate
	14 μg/L Sodium selenite
	543 mg/L NaHCO3
	20 mg/L Insulin
	10.7 mg/L Transferrin
	100 μg/L bFGF
	2 μg/L TGFβ1
	-> pH adjusted to 7.4 with NaOH
Ringer buffer	8,474 mg/L NaCl
	365 mg/L K2HPO4(•3H2O)
	54 mg/L KH2PO4
	583 mg/L Calcium gluconate
	901 mg/L D-Glucose
	203 mg/L MgCl2(•6H2O)
	-> pH adjusted to 7.4 with NaOH
TBS	ROTI®Stock 10x TBS
	60.57 g/L Tris(hydroxylmethylmethan)aminomethan
	86.1 g/L NaCl
	-> pH adjusted to 7.6 with HCl

## Sheet: RT-qPCR primer list
Target gene	Sequence or product reference
bActin	Forward: ATTGCCGACAGGATGCAGAA
	Reverse: GGGCCGGACTCGTCATACTC
GAPDH	Forward: CCATCTTCCAGGAGCGAGATC
	Reverse: GCAGAGATGATGACCCTTTTGG
p63	Forward: TCATTTGATTCGAGTAGAGGGGAAC
	Reverse: CTCCAACACAACTGCTGTTACACAT
KRT5	BioRad; qHsaCED0005398
MUC5AC	Forward: GCACCAACGACAGGAAGGATGAG
	Reverse: CACGTTCCAGAGCCGGACAT
FOXJ1	Forward: AGCCAGGCACCACATACTTA
	Reverse: GCTCTCCGCCATGTCTGC
CCSP	Forward: GGACACCCTCCCCCAAAAGC
	Reverse: TGGTGGGCGTGGACTCAAAG
CFTR	Forward: TGGAAAGAGAATGGGATAGAG
	Reverse: GTTCCTCCTTGTTATCCGGG
TMEM16A	BioRad; qHsaCED0044396

## Sheet: Eukaryotic cell lines
Human induced pluripotent stem cell (hiPSC) lines
ID	Abbreviation	CFTR genotype	Sex of origin	Gene modification status
MHHi001-A	WT	Wild type / Wild type	Female (XX)	None
MHHi002-A	CF	Phe508del / Phe508del	Male (XY)	None
Primary bronchial epithelial cells (PBECs)
ID	Abbreviation	CFTR	Sex of origin	Gene modification status
None	WT	Wild type / Wild type	Female (XX)	None
None	CF	Phe508del / Phe508del	Unknown	None
