# Supplementary material for: Human induced pluripotent stem cells for in vitro modeling of impaired mucociliary clearance in cystic fibrosis lung disease
Source: Stem Cell Res Ther. 2025 Oct 21;16:573. doi: 10.1186/s13287-025-04737-0 (PMC12538740; doi:10.1186/s13287-025-04737-0)
Supplement: Supplementary file 2 — Supplementary Material 2 [file 13287_2025_4737_MOESM2_ESM.xlsx]

## Sheet: Fig. 1 B
Cell line	c-Kit/CXCR4			EpCAM/CXCR4
	%	Double positive events - Living single cells	Total events - Living single cells	%	Double positive events - Living single cells	Total events - Living single cells
WT hiPSC (MHHi001-A)	98.5	14233	14454	98.8	14699	14885
CF hiPSC (MHHi002-A)	97.9	14143	14445	98	14370	14656

## Sheet: Fig. 1 C
Cell line	Differentiation label	NKX2.1 - Pre-MACS			EpCAM/CXCR4 - Negative fraction post-MACS			EpCAM/CXCR4 - Positive fraction post-MACS
		%	Positive events - Living single cells	Total events - Living single cells	%	Positive events - Living single cells	Total events - Living single cells	%	Positive events - Living single cells	Total events - Living single cells
WT hiPSC (MHHi001-A)	L26	62.7	16982	27084	27.7	7271	26237	82	21556	26284
	L29	50.3	15209	30219	8.6	2595	30077	76.1	26137	34338
	L32	52.3	13680	26156	13.9	3552	25621	81.8	25970	31731
	L49	17.7	4272	24152	9.7	2330	23984	70.3	18426	26204
	L50	26.3	6463	24608	13.6	3306	24226	84.2	21710	25782
	L51	40.5	11355	28036	18.5	5648	30523	85.1	24766	29105
CF hiPSC (MHHi002-A)	L26	75.4	22565	29926	3.5	576	16613	91.6	25407	27749
	L29	59.7	17314	28991	3	762	25079	87	29207	33571
	L32	61	17758	29096	2.5	321	12935	86.9	28262	32510
	L49	29.7	7674	25835	8.8	2388	27012	87.7	20647	23549
	L50	14.7	3000	20427	3.6	823	22714	71.1	15135	21273
	L51	43.9	12103	27594	4.3	1273	29427	78.9	23937	30330

## Sheet: Fig. 2
CT values, including technical duplicates
Cell line	Differentiation label	Target gene
		GAPDH	bActin	p63	KRT5	CCSP	FOXJ1	MUC5AC	CFTR	TMEM16A
WT pALI (PBEC Iso#18)	L26	21.1763	18.6098	23.9048	24.478	18.4947	27.1885	22.8622	24.2925	26.0957
		21.1605	18.5091	23.9989	24.3765	18.4666	27.1827	22.3301	24.3025	25.954
	L27	21.8793	19.2043	25.0268	25.5525	19.7064	30.6362	21.6388	24.5554	26.6978
		21.7839	19.1427	24.708	25.5092	19.7663	30.9425	21.6195	24.5045	26.5538
	L28	19.4818	17.4306	22.4782	25.2804	17.2362	25.2103	20.3882	22.5602	24.1088
		19.5916	17.3646	22.4433	24.8465	17.2894	25.1984	20.2279	22.4014	24.0692
	L29	19.3629	17.1097	22.286	25.0755	16.6837	23.5269	21.29	22.7977	24.0299
		19.3472	17.0987	22.2661	25.161	16.717	23.3154	21.1983	22.681	23.9328
CF pALI (PBEC BCF00191)	L26	20.3558	18.559	23.8629	24.3498	16.6836	30.0821	24.2099	24.7188	25.7807
		20.3841	18.4611	23.9304	24.3881	16.5045	30.4361	23.9088	24.7682	25.7289
	L27	21.1558	18.7561	24.5239	25.3597	17.7563	29.275	22.3354	23.8013	26.1865
		21.2537	18.7462	24.5258	25.7886	17.9611	29.257	22.435	23.8194	26.1902
	L28	19.5477	17.0846	22.1912	24.2813	16.1009	24.719	21.0913	21.8197	23.8058
		19.4342	17.0567	22.1826	24.3444	16.1794	24.8899	21.1552	21.8742	23.885
	L29	19.9704	17.7329	23.0825	25.6931	16.8076	26.5905	22.5731	22.7071	24.3146
		20.0497	17.696	23.0698	25.8285	16.8594	27.2148	22.8893	22.805	24.4054
WT iALI (WT hiPSC (MHHi001-A))	L27	19.9309	17.169	29.609	33.4685	23.2445	30.6954	29.4885	21.1357	26.5852
		19.9091	17.1854	29.2275	33.5782	23.1839	30.6871	29.6272	21.178	26.401
	L28	18.7787	16.1077	28.6639	34.7291	22.2086	24.6497	29.5123	20.8033	24.3928
		18.8955	16.1659	28.6088	34.6991	22.2796	24.4292	29.6429	20.849	24.3569
	L29	20.4273	18.6169	31.2914	33.96	25.782	33.7734	34.1916	22.3446	28.2289
		20.7839	18.6073	31.2331	34.0295	25.7778	33.8573	34.2055	22.2284	28.0159
CF pALI (CF hiPSC (MHHi002-A))	L26	19.189	17.0093	27.0048	32.3845	22.2766	26.1855	29.1951	22.0585	26.1908
		19.2885	17.0455	26.9704	32.2483	22.2696	26.8268	29.1496	22.2851	26.1281
	L27	20.6587	18.5224	28.3677	33.3372	23.387	31.5646	30.2627	23.1206	27.5093
		20.6981	18.6055	28.5741	33.8142	23.244	31.2778	30.3558	23.2428	27.7245
	L28	18.2558	16.227	26.0339	33.1877	21.0782	23.8102	28.6645	22.0006	25.0887
		18.2527	16.0956	26.0176	32.6592	21.0467	23.8171	28.819	21.7132	25.1026
	L29	19.5211	17.3317	27.2527	29.2304	23.628	29.5398	32.0025	21.6603	26.2919
		19.7989	17.3692	27.2259	29.2448	23.6636	29.9903	31.6128	21.7163	26.0575
Gene transcription relative to bActin and GAPDH (ΔCT)
Cell line	Differentiation label
		p63	KRT5	CCSP	FOXJ1	MUC5AC	CFTR	TMEM16A
WT pALI (PBEC Iso#18)	L26	0.0588037	0.0422971	2.60856	0.00625124	0.150497	0.0462761	0.0139762
	L27	0.0485339	0.0306431	1.70081	0.00080051	0.457994	0.0613249	0.0143455
	L28	0.062777	0.0103352	2.30433	0.00937337	0.279154	0.0619112	0.0203075
	L29	0.060521	0.00843964	2.88641	0.0273647	0.123751	0.0438959	0.0185593
CF pALI (PBEC BCF00191)	L26	0.0455433	0.0328282	7.18983	0.000553514	0.0406866	0.0253219	0.012562
	L27	0.0427812	0.0206719	4.34483	0.00159971	0.188524	0.0702013	0.0135047
	L28	0.066702	0.0152818	4.40943	0.0108689	0.139425	0.0844267	0.0211288
	L29	0.0538894	0.00838172	4.08055	0.00379853	0.0684427	0.0672757	0.0221323
WT iALI (WT hiPSC (MHHi001-A))	L27	0.000534447	3.10569e-05	0.0394012	0.000221153	0.000485159	0.163998	0.00405957
	L28	0.000440237	6.51787e-06	0.0369798	0.00753328	0.000229268	0.0988114	0.00844361
	L29	0.000310434	4.67112e-05	0.013878	5.28946e-05	4.05571e-05	0.156296	0.00273628
CF pALI (CF hiPSC (MHHi002-A))	L26	0.00216042	5.37515e-05	0.0567178	0.00301618	0.000475165	0.0608439	0.00383541
	L27	0.00216753	6.29913e-05	0.077252	0.000280431	0.000606145	0.0847571	0.00391778
	L28	0.00221579	1.85823e-05	0.0691213	0.0102667	0.000337221	0.0398538	0.00422188
	L29	0.00234843	0.000587818	0.0283486	0.000407811	9.89855e-05	0.110104	0.00491207

## Sheet: Fig. 3 C
Cell line	WT pALI (PBEC Iso#18)	CF pALI (PBEC BCF00191)	WT iALI (WT hiPSC (MHHi001-A))	CF pALI (CF hiPSC (MHHi002-A))
Measured value	MUC5AC+ area (%)	MUC5AC+ area (%)	MUC5AC+ area (%)	MUC5AC+ area (%)
	78.784	69.397	31.578	21.934
	79.602	75.977	34.753	17.347
	79.198	70.59	42.498	9.741
	79.077	73.06	3.042	18.861
	55.632	55.816	6.26	12.579
	52.762	64.211	4.056	19.675
	41.302	63.789	7.439	25.904
	38.342	63.789	34.762	21.048
	50.411	39.448	20.228	7.605
			27.379
			34.743
			36.233
			29.264

## Sheet: Fig. 3 D
Cell line	WT pALI (PBEC Iso#18)	CF pALI (PBEC BCF00191)	WT iALI (WT hiPSC (MHHi001-A))	CF pALI (CF hiPSC (MHHi002-A))
Measured value	TUBB4+ area (%)	TUBB4+ area (%)	TUBB4+ area (%)	TUBB4+ area (%)
	86.236	88.505	72.206	65.158
	69.149	88.031	76.184	72.266
	87.54	80.173	76.203	66.491
	78.263	87.33	78.118	60.815
	65.831	78.535	49.627	57.579
	68.766	61.924	48.611	38.403
	73.457	72.303	51.972	71.29
	55.619	56.001	35.358	66.824
	67.097	62.811	42.002	68.548

## Sheet: Fig. 5 C
Cell line	WT pALI (PBEC Iso#18)	CF pALI (PBEC BCF00191)		WT iALI (WT hiPSC (MHHi001-A))	CF pALI (CF hiPSC (MHHi002-A))
Condition	DMSO	DMSO	ETI	DMSO	DMSO	ETI
RTE (Ω·cm²)	227.003	355.596	276.196	173.325	689.297	424.785
	188.701	340.822	263.066	154.807	542.789	474.067
	178.83	334.585	196.511	137.624	642.661	382.95
	220.587	391.12	260.124	209.032	682.909	426.215
	201.46	278.171	260.902	161.949	465.567	457.918
	193.934	286.317	232.712	221.687	527.473	334.18
	183.158	364.535	258.487	193.979	423.835	444.452
	174.854	379.565	210.561	218.251	595.204	454.761
	162.154	307.413	214.449	189.838	655.879	333.315
	224.241	345.21	215.939	224.247	785.757	266.753
	181.164	336.151		188.576	549.934	408.886
	211.983	333.021		237.542	495.953	261.671
	246.14	342.311		172.158	623.701	177.72
	266.209	389.731		156.803	640.972	311.242
	266.673	380.68		177.96	433.293	456.266
	344.234	370.879		180.498	516.106	415.666
	296.536	383.406		180.12	452.519	437.943
	246.065	342.799		220.237	427.593	448.765
	280.377	347.241		177.44	448.549	302.999
	212.279	335.799		182.26	455.963	332.214
	272.649	326.389		689.811	366.719	339.819
	266.918	342.835		589.355	252.503	366.333
	284.439	398.812		317.977	160.92	309.717
	285.698	356.631		452.076	156.276	264.356
	193.773			215.332	174.05	279.166
	185.284			230.394	319.35	279.765
	207.144			426.132	765.533	297.116
				494.466	726.362	285.803
				691.15	356.255	289.067
				482.263	542.663	276.609
				977.043	448.768
				473.085	479.009
				270.458	317.562
				734.549	205.21
				263.486	319.814
				489.517	647.681
				914.968	776.774
				571.785	281.02
				927.954	501.913
				497.423	737.549
				873.934	598.533
				835.553	459.168
				721.617	493.29
				157.362	339.17
					570.448
					598.499
					701.397
					451.702
					446.468
					348.751
					430.265
					418.102
					357.325
					361.21
					214.825
					254.858
					360.571

## Sheet: Fig. 5 D
Cell line	WT pALI (PBEC Iso#18)	CF pALI (PBEC BCF00191)		WT iALI (WT hiPSC (MHHi001-A))	CF pALI (CF hiPSC (MHHi002-A))
Condition	DMSO	DMSO	ETI	DMSO	DMSO	ETI
ISC,Basal (µA/cm²)	7.93695	2.27507	15.4817	6.0684	4.03853	6.0094
	11.4733	2.58711	15.615	5.9292	4.34942	7.4315
	14.1243	2.42718	15.1383	6.16335	4.82439	5.58501
	13.9788	3.18363	14.0487	5.79162	5.15579	5.76285
	12.3818	4.64436	15.4425	7.5242	3.30863	5.68031
	15.9607	12.1419	17.8208	7.57633	3.91295	7.14712
	30.7273	4.07633	17.6032	9.7135	3.51174	9.74226
	31.5106	1.91095	13.3794	11.3371	6.85117	7.93879
	18.9187	4.23562	15.1825	14.1047	5.95077	8.06416
	13.7942	5.95686	14.0597	11.1601	8.47944	7.98672
	15.6195	5.33186		8.18584	7.42049	7.56084
	13.1112	6.13385		3.81361	6.16372	3.29093
	14.7483	6.34587		7.53872	5.48119	5.13274
	10.4287	2.88717		8.71497	7.40819	5.01106
	14.7655	2.8208		7.11191	5.38809	3.10841
	7.05752	2.67699		7.94893	5.6333	4.56858
	10.483	11.7588		13.5758	3.97124	12.4834
	9.375	5.09403		8.00608	5.29978	12.6604
	11.9137	8.64491		6.62795	5.91261	12.9425
	17.052	2.40044		7.02434	5.96792	8.87168
	10.094	3.70575		4.11504	3.73341	7.60509
	11.9192	6.31084		15.26	2.33407	5.79093
	7.51659	4.45796		4.84513	3.0531	7.83186
	7.97013	6.81416		7.39491	3.21903	9.10951
	17.5166			5.90155	4.33628	9.47456
	13.6117			8.05863	3.2135	9.49668
	10.0996			5.76327	6.79204	9.10951
				6.15597	2.62168	6.07301
				6.60398	2.41704	8.90487
				6.83567	2.45575	8.11394
				9.02102	3.08628
				2.25111	4.0708
				2.6604	4.33075
				3.45686	2.22837
				3.44027	9.89491
				1.15597	5.17146
				2.94248	5.49779
				5.72456	4.36947
				6.62058	5.60841
				4.96128	4.93363
				6.20575	5.37057
				7.27323	3.58407
				5.85177	5.09403
				4.59624	5.74115
					5.08296
					4.81748
					5.95133
					6.73119
					8.39049
					5.42588
					6.10619
					6.52102
					5.58075
					5.68031
					5.66925
					6.1615
					5.53097

## Sheet: Fig. 5 E
Cell line	WT pALI (PBEC Iso#18)	CF pALI (PBEC BCF00191)		WT iALI (WT hiPSC (MHHi001-A))	CF pALI (CF hiPSC (MHHi002-A))
Condition	DMSO	DMSO	ETI	DMSO	DMSO	ETI
ISC,Amil-In (µA/cm²)	5.64712	-0.618547	14.2911	4.99631	3.61633	5.62085
	11.4639	0.136799	15.9075	4.33038	4.00221	7.1078
	11.5328	0.211652	14.8783	4.9163	4.67847	4.99195
	12.7959	-1.1191	9.72345	7.06582	4.56637	4.90798
	10.2295	-0.332319	12.6715	5.79784	2.3101	5.28485
	13.4518	-0.266869	12.4392	6.73119	2.91985	6.64132
	19.8162	1.60398	10.113	8.77397	2.56939	8.89242
	15.2378	-0.0276549	10.9458	8.72173	5.99055	7.55136
	11.5339	1.52931	11.969	10.2257	5.12721	6.22788
	9.87279	0.0165929	10.7633	7.14712	6.6341	5.40929
	11.0103	-0.237832		6.80125	4.38053	4.92257
	9.98815	0.403761		3.0826	5.59596	2.37279
	9.60454	-0.196745		6.18732	4.54231	3.6781
	9.1344	0.276549		6.71855	5.54204	4.34181
	9.92533	0.492257		6.56843	4.40186	2.6604
	1.92478	0.0940265		7.44548	4.36394	4.4469
	4.23673	-0.630531		11.2113	3.14989	8.8219
	9.99447	-0.0663717		6.68418	3.95649	9.87832
	9.92257	-0.199115		5.55942	4.375	10.6416
	15.6914	-0.326327		5.64712	3.84956	8.09181
	10.4259	1.6427		3.44027	1.9469	6.33296
	12.1294	0.11615		16.8805	1.0177	4.19248
	2.95907	-0.265487		4.63496	3.6781	6.1781
	4.19248	1.53761		7.19027	2.84292	8.23562
	13.7555			4.88385	3.69469	8.01991
	6.5708			6.75885	2.4115	8.49558
	5.19358			4.97235	4.88385	7.48894
				5.75774	1.3219	4.6958
				6.61954	1.86394	7.63827
				8.48935	1.80863	6.31637
				7.92035	2.00221
				1.28872	3.32411
				1.85841	3.40194
				1.91372	2.04211
				1.36615	7.07411
				1.39381	2.80973
				2.0354	3.75553
				4.64049	3.04757
				5.79093	3.63938
				3.89381	3.6615
				5.11062	3.87721
				5.49226	1.17257
				4.22566	2.61062
				2.90929	2.88717
					2.5885
					2.85951
					2.75442
					4.50221
					6.04535
					2.93695
					4.24779
					4.2146
					3.30752
					3.76106
					3.58407
					3.68916
					2.76549

## Sheet: Fig. 5 F
Cell line	WT pALI (PBEC Iso#18)	CF pALI (PBEC BCF00191)		WT iALI (WT hiPSC (MHHi001-A))	CF pALI (CF hiPSC (MHHi002-A))
Condition	DMSO	DMSO	ETI	DMSO	DMSO	ETI
ΔIAmil (µA/cm²)	-2.28982	-2.89362	-1.19063	-1.07209	-0.422198	-0.388551
	-0.00944862	-2.45031	0.292496	-1.59882	-0.347207	-0.323697
	-2.59145	-2.21552	-0.259955	-1.24705	-0.145926	-0.593052
	-1.18294	-4.30273	-4.32522	1.2742	-0.589417	-0.854864
	-2.15224	-4.97668	-2.77102	-1.72636	-0.998525	-0.395465
	-2.50894	-12.4087	-5.38164	-0.845133	-0.9931	-0.505808
	-10.9111	-2.47235	-7.49026	-0.939528	-0.942354	-0.849834
	-16.2728	-1.93861	-2.43363	-2.61538	-0.860627	-0.387431
	-7.38477	-2.70631	-3.21349	-3.87901	-0.823562	-1.83628
	-3.92146	-5.94027	-3.29646	-4.013	-1.84535	-2.57743
	-4.60914	-5.56969		-1.38459	-3.03996	-2.63827
	-3.12302	-5.73009		-0.73101	-0.567754	-0.918141
	-5.14381	-6.54261		-1.3514	-0.938883	-1.45465
	-1.29425	-2.61062		-1.99642	-1.86615	-0.669248
	-4.84015	-2.32854		-0.543484	-0.986225	-0.448009
	-5.13274	-2.58296		-0.50345	-1.26936	-0.121682
	-6.24631	-12.3894		-2.36449	-0.821349	-3.6615
	0.61947	-5.1604		-1.3219	-1.34329	-2.78208
	-1.99115	-8.84403		-1.06853	-1.53761	-2.30089
	-1.36062	-2.72677		-1.37721	-2.11836	-0.779868
	0.331857	-2.06305		-0.674779	-1.7865	-1.27212
	0.210177	-6.19469		1.62057	-1.31637	-1.59845
	-4.55752	-4.72345		-0.210177	0.625	-1.65376
	-3.77765	-5.27655		-0.204646	-0.376106	-0.873894
	-3.76106			-1.0177	-0.641593	-1.45465
	-7.04093			-1.29978	-0.801991	-1.00111
	-4.90597			-0.790929	-1.90819	-1.62058
				-0.39823	-1.29978	-1.37721
				0.0155559	-0.553098	-1.26659
				1.65368	-0.647124	-1.79757
				-1.10066	-1.08407
				-0.962389	-0.746682
				-0.801991	-0.928808
				-1.54314	-0.186253
				-2.07412	-2.8208
				0.237832	-2.36173
				-0.90708	-1.74226
				-1.08407	-1.3219
				-0.829646	-1.96903
				-1.06748	-1.27212
				-1.09513	-1.49336
				-1.78097	-2.4115
				-1.62611	-2.48341
				-1.68695	-2.85398
					-2.49447
					-1.95796
					-3.1969
					-2.22898
					-2.34513
					-2.48894
					-1.85841
					-2.30642
					-2.27323
					-1.91925
					-2.08518
					-2.47234
					-2.76549

## Sheet: Fig. 5 G
Cell line	WT pALI (PBEC Iso#18)	CF pALI (PBEC BCF00191)		WT iALI (WT hiPSC (MHHi001-A))	CF pALI (CF hiPSC (MHHi002-A))
Condition	DMSO	DMSO	ETI	DMSO	DMSO	ETI
ΔIFsk+IBMX (µA/cm²)	29.7973	9.13265	13.1397	4.67238	2.84218	5.39039
	15.8619	7.68676	15.9555	3.01751	2.46587	6.04416
	13.9738	7.34484	11.0328	3.97682	1.74161	4.08748
	19.1632	5.34015	18.1858	4.91869	2.64565	3.73656
	32.8291	8.07845	14.2201	3.8762	3.74286	4.83868
	33.8219	7.78125	19.7954	6.59914	2.58149	4.56444
	43.9264	7.08241	18.9379	7.42441	3.42066	6.39629
	33.6692	7.83278	5.51991	8.65474	2.82838	6.55055
	31.8529	8.45962	2.51106	8.84375	3.24668	5.48673
	36.7423	5.64159	2.20686	8.93556	2.78561	5.96792
	27.3171	5.79093		9.43354	4.12703	5.45907
	35.3824	5.97345		3.48267	3.24253	1.34956
	37.8402	5.49665		7.2806	3.18169	0.276549
	26.663	13.6283		7.21213	3.41482	0.984513
	30.9384	12.7046		7.07261	2.08965	1.59845
	32.6493	9.64602		9.63693	2.60647	3.29093
	36.8971	2.61062		9.30033	2.80697	6.89712
	31.7741	3.61173		5.40653	3.06785	6.26659
	27.0077	3.87168		5.15961	2.54978	6.15044
	19.5866	3.24668		3.63661	2.61615	3.26881
	31.1283	6.25553		1.42146	3.0531	3.24115
	29.0929	1.07854		12.2622	1.8962	2.09624
	26.0177	2.18473		1.21128	2.27139	3.25774
	25.8186	1.89712		3.8219	2.16814	1.24447
	5.98451			1.28872	1.60398	0.829646
	7.35066			6.69801	1.56527	0.984513
	8.37942			5.68031	0.978982	2.81527
				5.68584	0.448009	1.83628
				9.03035	2.01881	0.436947
				8.60896	2.15155	0.868363
				13.6975	0.304204
				1.74502	0.785398
				3.37389	1.41369
				5.24336	1.44916
				3.70575	2.17367
				1.70354	1.32743
				4.48009	1.80863
				4.96128	2.23451
				4.82854	0.984513
				4.58518	1.65473
				4.52434	0.688606
				7.14602	1.13938
				3.3573	0.580752
				3.63938	0.713496
					1.02323
					0.951327
					0.857301
					0.564159
					0.448009
					1.61504
					2.1792
					2.02434
					0.22677
					0.0719024
					0.448009
					0.309734
					0.149336

[truncated: 6 more sheets: Fig. 5 H, Fig. 5 I, Fig. 5 J, Fig. 6 B, Fig. 8 C, Fig. 8 D]
